# Supplementary material
Source: Springer Nature journal article supplement (https://www.springermedizin.de/resource/supplementary/12889_2012_5163_MOESM7_ESM.pdf/9494808)
Supplement: MOESM7 [file 9494808]

765 participants in health screening program  
in September 2011 (After earthquake)

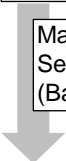

Matching with data in  
September to October 2010  
(Baseline)

Data from 200 participants were  
retrospectively analyzed in this study

- Tsunami evacuee ( $n=108$ )
- Radiation evacuee ( $n=92$ )
